# Supplementary material for: Understanding the role of distance, direction and cue salience in an associative model of landmark learning
Source: PubMed Central journal article supplement (PMC6376129; doi:10.1038/s41598-019-38525-7), 2019-02-14
Supplement: 41598_2019_38525_MOESM1_ESM.pdf [file 41598_2019_38525_MOESM1_ESM.pdf]

**Understanding the role of distance, direction and cue salience in an associative model of landmark learning.**

Sean Commins<sup>1\*</sup>, Dirk Fey<sup>2</sup>

<sup>1</sup>Department of Psychology,  
Maynooth University,  
Maynooth,  
Co. Kildare,  
Ireland.

<sup>2</sup>Systems Biology Ireland  
Conway Institute,  
University College Dublin,  
Dublin,  
Ireland.

**Contribution**

SC: Formulated overall concept. Wrote and read paper.

DF: Designed the model, ran simulations. Wrote and read paper.

\*Corresponding author; email: Sean.Commins@nuim.ie; fax: +353-1-7084767; telephone: +353-1-7084765.

Supplement 1. Example of a simulated rat's swimming path

S1a. Untrained rat (simulated)

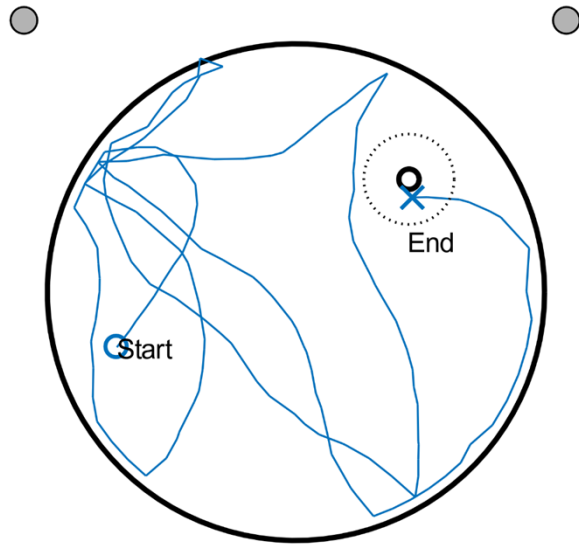

b. Trained rat (simulated)

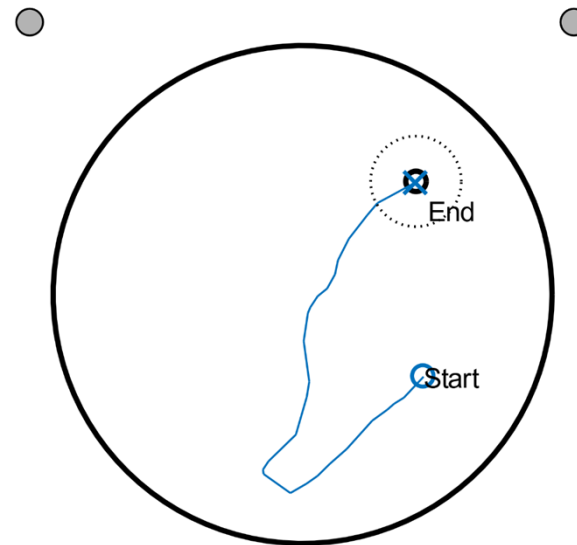

b. Untrained rat (experiment)

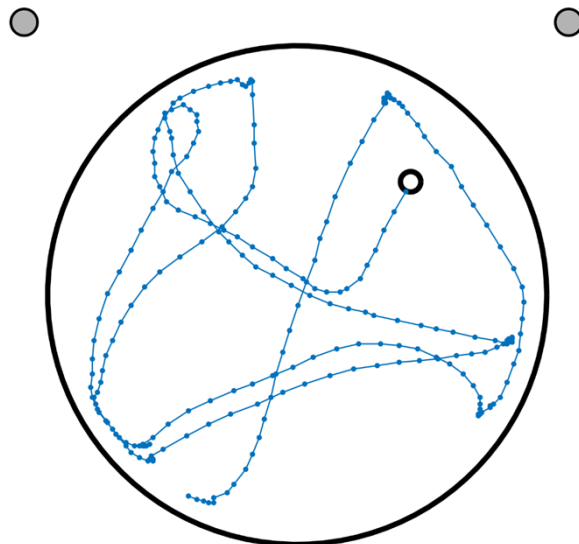

b. Trained rat (experiment)

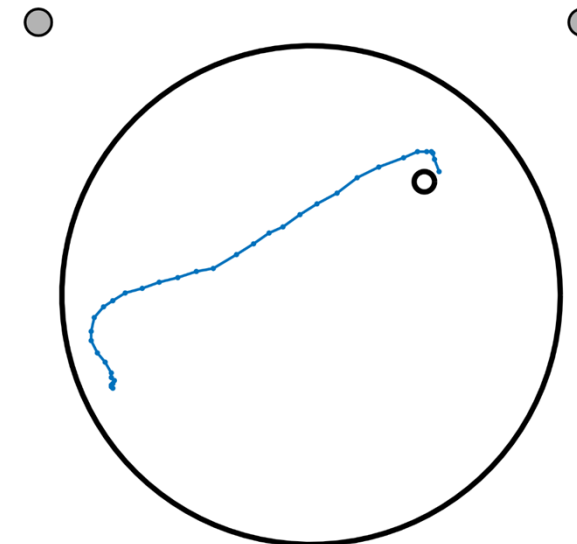

**Supplement 2. Varying cue position changes searching dynamics depending on use of directional and distance information.**

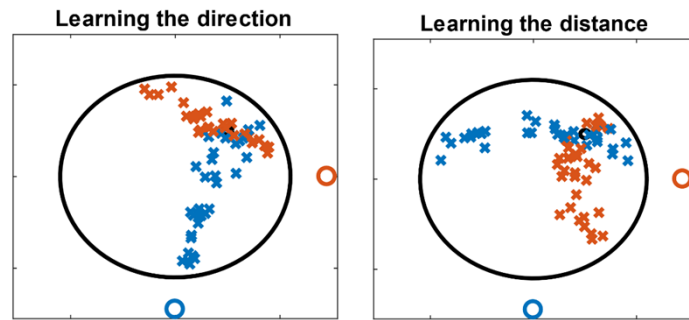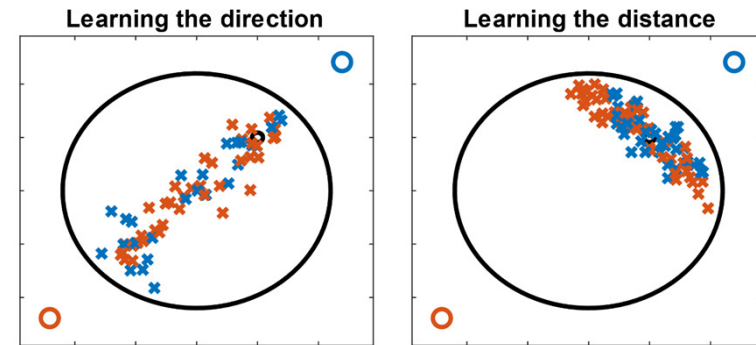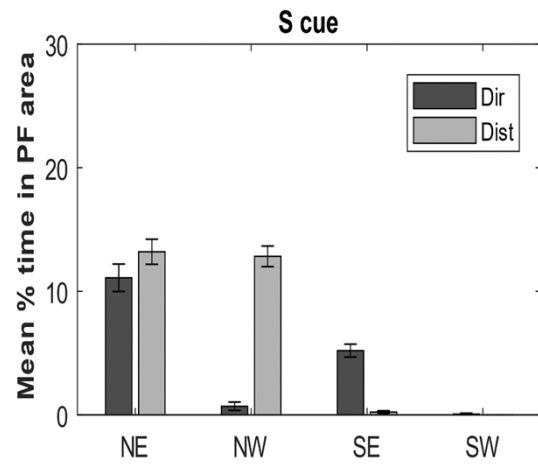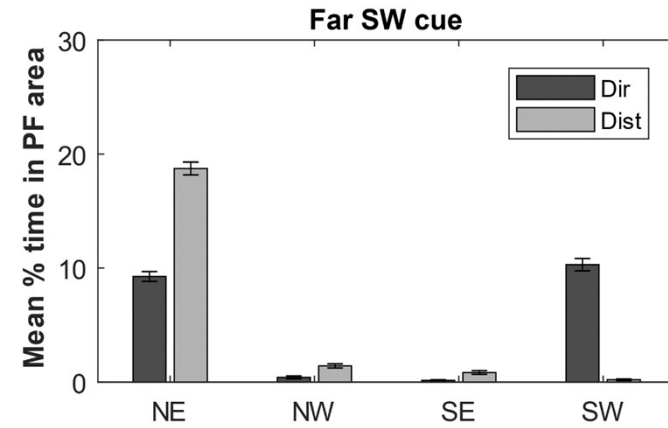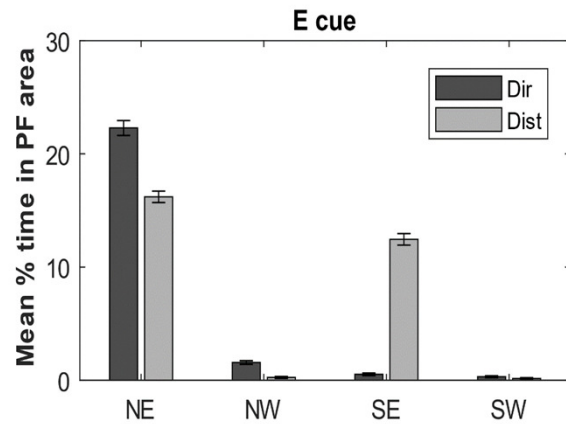

### Supplement 3. Rat can distinguish cues independent of salience

#### S3. Equal cue saliences

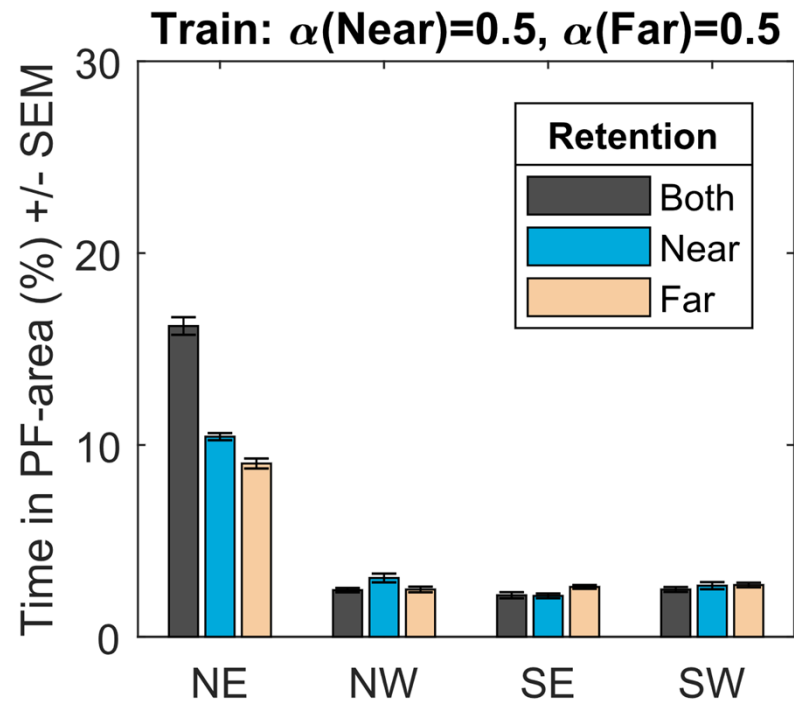

## Supplement 4.

S4a.

Rats only learn bright cue (far)  
Retention: use cue if present

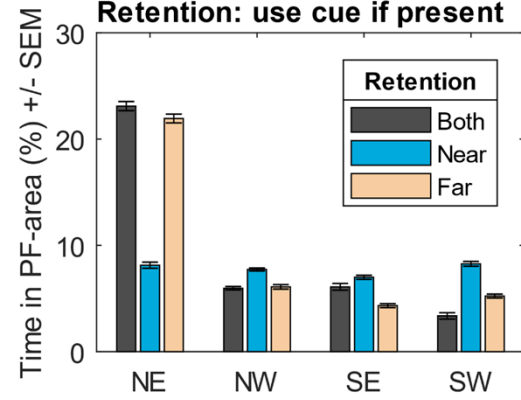

S4b.

Rats learn cues (far:near 30:70)  
Confuse near as far 50% of time

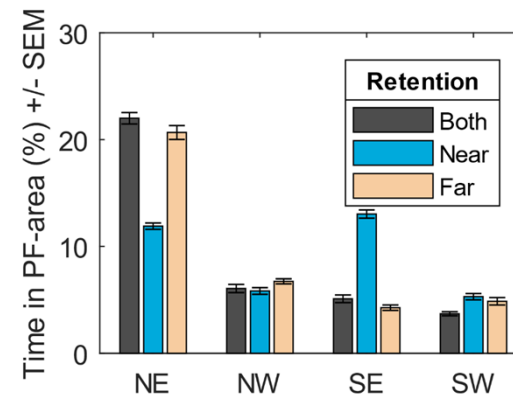

## Supplementary Table 1

| Swimming behavior model (AR random walk & controller) |            |            |               |               |                |                 |                 |                  |
|-------------------------------------------------------|------------|------------|---------------|---------------|----------------|-----------------|-----------------|------------------|
| Parameter                                             | $A_1$      | $A_2$      | $F$           | $K$           |                |                 |                 |                  |
| Value                                                 | 0.174      | 0.153      | 0.95          | 0.5           |                |                 |                 |                  |
| Rescorla Wagner learning model                        |            |            |               |               |                |                 |                 |                  |
| Parameter                                             | $\alpha_1$ | $\alpha_2$ | $\beta_{use}$ | $\beta_{dir}$ | $\beta_{dist}$ | $\lambda_{use}$ | $\lambda_{dir}$ | $\lambda_{dist}$ |
| Value                                                 | 0.5        | 0.5        | 0.2           | 0.2           | 0.2            | 0.33            | 1               | 1                |
